# Supplementary material for: Improved oxygenation in prone positioning of mechanically ventilated patients with COVID-19 acute respiratory distress syndrome is associated with decreased pulmonary shunt fraction: a prospective multicenter study
Source: Springer Nature journal article supplement (doi:10.1186/s40001-023-01559-9), 2023-12-16
Supplement: MOESM1 [file 26536238]

Supplemental figure 1

Individual temporal responses to proning. A. PFI, B. Vd/Vt, C. Qs/Qt, D. V<sub>A</sub>/Q. Blue area is standard deviation.

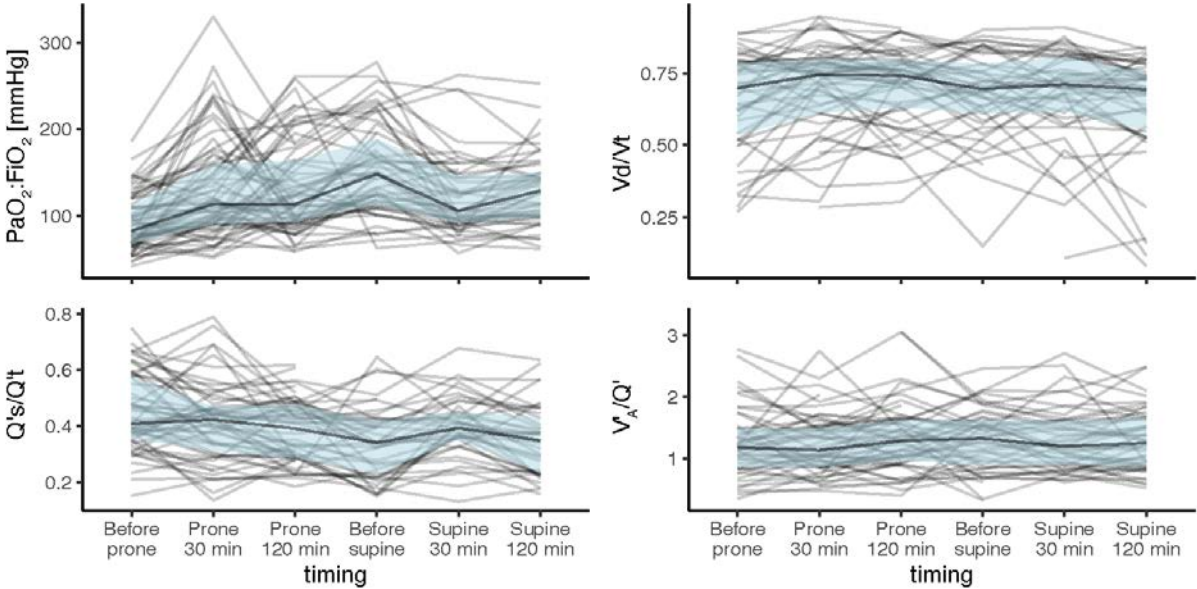

Supplemental Table 1

Pulmonary physiology values for six timepoints during the first proning session. Median (IQR). Qs/Qt (pulmonary shunt). B. Vd/Vt (ratio of airway dead space to alveolar tidal volume). C. V<sub>A</sub>/Q (Ventilation-perfusion ratio), D. PFI.

| Characteristic <sup>1</sup>        | bsl supine,<br>N = 71 | 30 prone,<br>N = 71  | 120 prone,<br>N = 71 | prone before<br>turn, N = 71 | 30 supine,<br>N = 71 | 120 supine,<br>N = 71 |
|------------------------------------|-----------------------|----------------------|----------------------|------------------------------|----------------------|-----------------------|
| Q's/Q't                            | 0.41 (0.36,<br>0.57)  | 0.42 (0.31,<br>0.47) | 0.39 (0.29,<br>0.48) | 0.34 (0.23,<br>0.42)         | 0.39 (0.35,<br>0.45) | 0.35 (0.24,<br>0.43)  |
| Unknown                            | 12                    | 13                   | 15                   | 26                           | 30                   | 30                    |
| Vd/Vtalv                           | 0.55 (0.46,<br>0.65)  | 0.56 (0.47,<br>0.67) | 0.61 (0.49,<br>0.69) | 0.59 (0.47,<br>0.69)         | 0.62 (0.50,<br>0.67) | 0.61 (0.54,<br>0.65)  |
| Unknown                            | 14                    | 7                    | 12                   | 20                           | 25                   | 26                    |
| V <sub>A</sub> /Q'                 | 1.18 (0.87,<br>1.49)  | 1.13 (0.87,<br>1.48) | 1.28 (0.96,<br>1.58) | 1.32 (0.89,<br>1.61)         | 1.19 (0.90,<br>1.60) | 1.25 (0.87,<br>1.66)  |
| Unknown                            | 21                    | 14                   | 16                   | 23                           | 24                   | 24                    |
| PaO <sub>2</sub> :FiO <sub>2</sub> | 83 (68, 111)          | 114 (91, 160)        | 114 (94, 164)        | 148 (114, 188)               | 106 (92, 145)        | 129 (100, 150)        |
| Unknown                            | 2                     | 2                    | 1                    | 11                           | 19                   | 23                    |
| <sup>1</sup> Median (IQR)          |                       |                      |                      |                              |                      |                       |

Supplemental table 2

Determination of responders to prone positioning based on PaO<sub>2</sub>:FiO<sub>2</sub> increase greater than or equal to 20mmHg, dynamic compliance (C<sub>dyn</sub>) improvement, Ventilatory Ratio and CO<sub>2</sub> decrease.

Δ% = relative percent change. @30min= timepoint 30minutes after proning. @16h = timepoint 16 hours after proning.

| Prone response                                                                           | PaO <sub>2</sub> /FiO <sub>2</sub> | C <sub>dyn</sub> | Ventilatory Ratio | CO <sub>2</sub> |
|------------------------------------------------------------------------------------------|------------------------------------|------------------|-------------------|-----------------|
| Responders @30min; % (N/tot)                                                             | 61 (42/69)                         | 46 (27/59)       | 33 (22/67)        | 28 (19/68)      |
| Responders @19h; % (N/tot)                                                               | 82 (49/60)                         | 45 (25/56)       | 4 (2/56)          | 58 (35/60)      |
| Δ% change @30min; median (25th;75th)                                                     | 57 (37; 90)                        | 15 (10; 43)      | -9 (3; 13)        | -5 (3; 9)       |
| Δ% change @19h; median (25th;75th)                                                       | 82 (47; 148)                       | 31 (10; 59)      | -                 | -7 (4; 12)      |
| PaO <sub>2</sub> :FiO <sub>2</sub> responders that improved C <sub>dyn</sub> ; % (N/tot) | -                                  | 37 (18/42)       | -                 | -               |

Supplemental table 3

Ventilation modes used during the study.

| Mode    | bsl supine | 30 prone | 120 prone | prone before turn | 30 supine, | 120 supine, |
|---------|------------|----------|-----------|-------------------|------------|-------------|
| PC      | 10         | 0        | 0         | 0                 | 0          | 0           |
| PRVC    | 2          | 0        | 0         | 0                 | 0          | 0           |
| PSV     | 6          | 14       | 13        | 13                | 13         | 9           |
| SIMV    | 20         | 23       | 23        | 23                | 23         | 23          |
| PRVC    | 2          | 0        | 0         | 0                 | 0          | 0           |
| DuoPAP  | 1          | 2        | 2         | 1                 | 0          | 0           |
| BiLevel | 2          | 2        | 2         | 0                 | 0          | 0           |
| APRV    | 6          | 6        | 6         | 4                 | 0          | 0           |
| CPAP    | 2          | 3        | 3         | 0                 | 0          | 0           |
| iASV    | 0          | 13       | 13        | 13                | 13         | 14          |
| MMV     | 0          | 4        | 4         | 3                 | 0          | 0           |
| VKTS    | 0          | 1        | 2         | 1                 | 1          | 1           |
